# Supplementary material for: Optimizing the Power of Genome-Wide Association Studies by Using Publicly Available Reference Samples to Expand the Control Group
Source: PubMed Central journal article supplement (PMC2962805; doi:10.1002/gepi.20482), 2010-01-20

Supplementary Table I. False positive error rate (FPER) of three trend tests of association over 5,000 replicates of 100 cases, 100 controls and 100 samples from each of three external cohorts: T\_CC, cases against controls from the source population, without correction for population structure; T\_F, cases against control cohort expanded by external samples, without correction for population structure; T\_FmDs, cases against control cohort expanded by external samples, corrected for up to three axes of genetic variation determined through MDS using 100,000 uncorrelated SNPs. Mean maximum likelihood estimates of the allelic odds ratio are presented, together with the 5- and 95-percentiles over 5,000 replicates of data. Results are presented for varying degrees of population structure, represented by  $F_{ST}$ , for a significance level of 5%.

| $F_{ST}$ | T_CC |                    |           | T_F   |                    |           | T_FmDs |                    |           |
|----------|------|--------------------|-----------|-------|--------------------|-----------|--------|--------------------|-----------|
|          | FPER | Allelic odds ratio |           | FPER  | Allelic odds ratio |           | FPER   | Allelic odds ratio |           |
|          |      | Mean               | 5-95%     |       | Mean               | 5-95%     |        | Mean               | 5-95%     |
| 0        | 5.4% | 1.00               | 0.65-1.52 | 5.5%  | 0.99               | 0.70-1.37 | 5.5%   | 0.99               | 0.70-1.37 |
| 0.001    | 4.9% | 1.00               | 0.65-1.51 | 5.5%  | 0.99               | 0.70-1.38 | 5.6%   | 0.99               | 0.70-1.40 |
| 0.002    | 4.6% | 1.00               | 0.66-1.52 | 6.2%  | 0.99               | 0.70-1.39 | 5.7%   | 1.00               | 0.65-1.49 |
| 0.005    | 5.4% | 1.00               | 0.65-1.52 | 6.6%  | 0.99               | 0.70-1.40 | 5.9%   | 0.99               | 0.64-1.54 |
| 0.01     | 4.6% | 1.00               | 0.66-1.51 | 8.6%  | 1.00               | 0.68-1.45 | 4.8%   | 1.00               | 0.66-1.51 |
| 0.02     | 5.0% | 1.00               | 0.66-1.53 | 11.6% | 1.00               | 0.67-1.49 | 5.2%   | 1.00               | 0.65-1.55 |
| 0.05     | 5.5% | 1.00               | 0.64-1.52 | 22.5% | 1.01               | 0.60-1.69 | 5.6%   | 1.00               | 0.64-1.53 |
| 0.1      | 5.2% | 1.00               | 0.66-1.52 | 32.0% | 1.03               | 0.56-1.98 | 5.4%   | 1.00               | 0.66-1.52 |

Supplementary Table II. Power of three trend tests of association for a SNP with minor allele frequency of 20% and a heterozygous genotype relative risk of 1.5 over 5,000 replicates of 100 cases, 100 controls and 100 samples from each of three external cohorts: T\_CC, cases against controls from the source population, without correction for population structure; T\_F, cases against control cohort expanded by external samples, without correction for population structure; T\_FmDs, cases against control cohort expanded by external samples, corrected for up to three axes of genetic variation determined through MDS using 100,000 uncorrelated SNPs. Mean maximum likelihood estimates of the allelic odds ratio are presented, together with the 5- and 95-percentiles over 5,000 replicates of data. Results are presented for varying degrees of population structure, represented by  $F_{ST}$ , for a significance level of 5%.

| $F_{ST}$ | T_CC  |                    |           | T_F   |                    |           | T_FmDs |                    |           |
|----------|-------|--------------------|-----------|-------|--------------------|-----------|--------|--------------------|-----------|
|          | Power | Allelic odds ratio |           | Power | Allelic odds ratio |           | Power  | Allelic odds ratio |           |
|          |       | Mean               | 5-95%     |       | Mean               | 5-95%     |        | Mean               | 5-95%     |
| 0        | 40.7% | 1.51               | 1.03-2.29 | 59.0% | 1.50               | 1.10-2.04 | 58.9%  | 1.50               | 1.10-2.04 |
| 0.001    | 41.0% | 1.52               | 1.03-2.28 | 59.2% | 1.50               | 1.10-2.03 | 57.7%  | 1.50               | 1.09-2.05 |
| 0.002    | 39.7% | 1.51               | 1.03-2.27 | 58.6% | 1.50               | 1.10-2.06 | 46.7%  | 1.52               | 1.04-2.22 |
| 0.005    | 41.0% | 1.52               | 1.03-2.30 | 57.6% | 1.50               | 1.08-2.07 | 43.6%  | 1.53               | 1.03-2.31 |
| 0.01     | 41.0% | 1.52               | 1.03-2.29 | 58.8% | 1.50               | 1.06-2.12 | 41.9%  | 1.53               | 1.03-2.31 |
| 0.02     | 40.0% | 1.51               | 1.00-2.27 | 57.1% | 1.50               | 1.01-2.24 | 40.7%  | 1.51               | 1.00-2.29 |
| 0.05     | 41.1% | 1.51               | 1.03-2.25 | 58.6% | 1.52               | 0.94-2.56 | 41.5%  | 1.51               | 1.02-2.25 |
| 0.1      | 40.1% | 1.51               | 1.00-2.27 | 58.9% | 1.53               | 0.82-2.91 | 40.6%  | 1.51               | 1.01-2.26 |

Supplementary Table III. False positive error rate (FPER) of the trend tests of association, adjusting for up to three axes of genetic variation (T\_FmDs), over 5,000 replicates of 100 cases, 100 controls and 100 samples from each of three external cohorts. Mean maximum likelihood estimates of the allelic odds ratio are presented, together with the 5- and 95-percentiles over 5,000 replicates of data. Results are presented for a range of  $F_{ST}$  for a significance level of 5%: (a) adjusting for each of the first three axes of genetic variation that are correlated with disease status using  $p < 0.05$ ; (b) adjusting for each of the first three axes of genetic variation that are correlated with disease status using  $p < 0.1$ ; and (c) all of the first three axes of genetic variation, irrespective of their correlation with disease status.

| $F_{ST}$ | Axes with $p < 0.05$ |                    |           | Axes with $p < 0.1$ |                    |           | All axes |                    |           |
|----------|----------------------|--------------------|-----------|---------------------|--------------------|-----------|----------|--------------------|-----------|
|          | FPER                 | Allelic odds ratio |           | FPER                | Allelic odds ratio |           | FPER     | Allelic odds ratio |           |
|          |                      | Mean               | 5-95%     |                     | Mean               | 5-95%     |          | Mean               | 5-95%     |
| 0        | 4.9%                 | 0.99               | 0.71-1.37 | 4.6%                | 0.99               | 0.71-1.36 | 5.4%     | 1.00               | 0.71-1.39 |
| 0.001    | 5.3%                 | 0.99               | 0.70-1.38 | 5.4%                | 1.00               | 0.71-1.38 | 5.4%     | 1.00               | 0.71-1.39 |
| 0.002    | 5.6%                 | 0.99               | 0.70-1.40 | 5.8%                | 0.99               | 0.70-1.38 | 5.4%     | 1.00               | 0.70-1.39 |
| 0.005    | 6.4%                 | 0.99               | 0.66-1.45 | 6.2%                | 1.00               | 0.67-1.47 | 6.4%     | 1.00               | 0.67-1.46 |
| 0.01     | 6.3%                 | 1.00               | 0.65-1.53 | 5.9%                | 1.00               | 0.65-1.53 | 6.5%     | 1.00               | 0.64-1.55 |
| 0.02     | 6.1%                 | 0.99               | 0.64-1.54 | 5.5%                | 1.00               | 0.64-1.53 | 6.4%     | 1.00               | 0.64-1.55 |
| 0.05     | 5.2%                 | 1.00               | 0.65-1.54 | 5.5%                | 1.00               | 0.65-1.54 | 5.4%     | 1.00               | 0.65-1.53 |
| 0.1      | 5.5%                 | 1.00               | 0.65-1.54 | 5.5%                | 1.00               | 0.65-1.53 | 5.2%     | 1.01               | 0.66-1.54 |

Supplementary Table IV. Power of the trend test of association, adjusting for up to three axes of genetic variation (T\_Fmnds), for a SNP with minor allele frequency of 20% and a heterozygous genotype relative risk of 1.5 over 5,000 replicates of 100 cases, 100 controls and 100 samples from each of three external cohorts. Mean maximum likelihood estimates of the allelic odds ratio are presented, together with the 5- and 95-percentiles over 5,000 replicates of data. Results are presented for a range of  $F_{ST}$  for a significance level of 5%: (a) adjusting for each of the first three axes of genetic variation that are correlated with disease status using  $p < 0.05$ ; (b) adjusting for each of the first three axes of genetic variation that are correlated with disease status using  $p < 0.1$ ; and (c) all of the first three axes of genetic variation, irrespective of their correlation with disease status.

| $F_{ST}$ | Axes with $p < 0.05$ |                    |           | Axes with $p < 0.1$ |                    |           | All axes |                    |           |
|----------|----------------------|--------------------|-----------|---------------------|--------------------|-----------|----------|--------------------|-----------|
|          | Power                | Allelic odds ratio |           | Power               | Allelic odds ratio |           | Power    | Allelic odds ratio |           |
|          |                      | Mean               | 5-95%     |                     | Mean               | 5-95%     |          | Mean               | 5-95%     |
| 0        | 59.6%                | 1.51               | 1.11-2.03 | 59.4%               | 1.50               | 1.09-2.01 | 58.8%    | 1.50               | 1.09-2.03 |
| 0.001    | 59.5%                | 1.51               | 1.10-2.05 | 58.5%               | 1.50               | 1.10-2.05 | 58.1%    | 1.50               | 1.09-2.04 |
| 0.002    | 58.6%                | 1.51               | 1.08-2.08 | 59.3%               | 1.50               | 1.08-2.06 | 59.1%    | 1.51               | 1.08-2.08 |
| 0.005    | 50.4%                | 1.51               | 1.05-2.18 | 51.3%               | 1.52               | 1.05-2.18 | 50.1%    | 1.51               | 1.05-2.18 |
| 0.01     | 45.1%                | 1.53               | 1.01-2.33 | 46.1%               | 1.53               | 1.04-2.27 | 45.4%    | 1.53               | 1.03-2.29 |
| 0.02     | 42.7%                | 1.53               | 1.02-2.31 | 43.5%               | 1.53               | 1.02-2.31 | 43.7%    | 1.53               | 1.01-2.32 |
| 0.05     | 42.4%                | 1.53               | 1.01-2.31 | 40.8%               | 1.52               | 1.00-2.32 | 42.0%    | 1.52               | 1.03-2.28 |
| 0.1      | 41.8%                | 1.53               | 1.01-2.31 | 40.4%               | 1.51               | 1.02-2.30 | 40.6%    | 1.52               | 1.01-2.30 |

Supplementary Table V. False positive error rate (FPER) of the trend test of association, adjusting for axes of genetic variation (T\_FmDs), over 5,000 replicates of 100 cases, 100 controls and 100 samples from each of three external cohorts. Mean maximum likelihood estimates of the allelic odds ratio are presented, together with the 5- and 95-percentiles over 5,000 replicates of data. Results are presented for a range of  $F_{ST}$  for a significance level of 5%: (a) adjusting for each of the first three axes of genetic variation that are correlated with disease status using  $p < 0.05$ ; (b) adjusting for each of the first then axes of genetic variation that are correlated with disease status using  $p < 0.05$ . Also presented is the proportion of replicates for which more than the first three axes of genetic variation were selected to adjust for population structure.

| $F_{ST}$ | Up to three axes |                    |           | Up to ten axes |                    |           |         |
|----------|------------------|--------------------|-----------|----------------|--------------------|-----------|---------|
|          | FPER             | Allelic odds ratio |           | FPER           | Allelic odds ratio |           | >3 axes |
|          |                  | Mean               | 5-95%     |                | Mean               | 5-95%     |         |
| 0        | 4.9%             | 0.99               | 0.71-1.37 | 5.0%           | 0.99               | 0.71-1.38 | 0.0008  |
| 0.001    | 5.3%             | 0.99               | 0.70-1.38 | 4.7%           | 1.00               | 0.71-1.38 | 0.0094  |
| 0.002    | 5.6%             | 0.99               | 0.70-1.40 | 6.2%           | 1.00               | 0.70-1.40 | 0.0868  |
| 0.005    | 6.4%             | 0.99               | 0.66-1.45 | 5.7%           | 0.99               | 0.67-1.45 | 0.1176  |
| 0.01     | 6.3%             | 1.00               | 0.65-1.53 | 6.2%           | 0.99               | 0.64-1.52 | 0.0118  |
| 0.02     | 6.1%             | 0.99               | 0.64-1.54 | 6.6%           | 0.99               | 0.63-1.54 | 0.0070  |
| 0.05     | 5.2%             | 1.00               | 0.65-1.54 | 6.2%           | 1.00               | 0.65-1.55 | 0.0034  |
| 0.1      | 5.5%             | 1.00               | 0.65-1.54 | 5.1%           | 1.00               | 0.66-1.53 | 0.0048  |

Supplementary Table VI. Power of the trend test of association, adjusting for axes of genetic variation (T\_FmDs), for a SNP with minor allele frequency of 20% and a heterozygous genotype relative risk of 1.5 over 5,000 replicates of 100 cases, 100 controls and 100 samples from each of three external cohorts. Mean maximum likelihood estimates of the allelic odds ratio are presented, together with the 5- and 95-percentiles over 5,000 replicates of data. Results are presented for a range of  $F_{ST}$  for a significance level of 5%: (a) adjusting for each of the first three axes of genetic variation that are correlated with disease status using  $p < 0.05$ ; (b) adjusting for each of the first then axes of genetic variation that are correlated with disease status using  $p < 0.05$ . Also presented is the proportion of replicates for which more than the first three axes of genetic variation were selected to adjust for population structure.

| $F_{ST}$ | Up to three axes |                    |           | Up to ten axes |                    |           |         |
|----------|------------------|--------------------|-----------|----------------|--------------------|-----------|---------|
|          | Power            | Allelic odds ratio |           | Power          | Allelic odds ratio |           | >3 axes |
|          |                  | Mean               | 5-95%     |                | Mean               | 5-95%     |         |
| 0        | 59.6%            | 1.51               | 1.11-2.03 | 59.1%          | 1.50               | 1.10-2.04 | 0.0014  |
| 0.001    | 59.5%            | 1.51               | 1.10-2.05 | 56.7%          | 1.49               | 1.09-2.06 | 0.0126  |
| 0.002    | 58.6%            | 1.51               | 1.08-2.08 | 57.5%          | 1.50               | 1.08-2.06 | 0.0890  |
| 0.005    | 50.4%            | 1.51               | 1.05-2.18 | 49.1%          | 1.51               | 1.04-2.18 | 0.1120  |
| 0.01     | 45.1%            | 1.53               | 1.01-2.33 | 45.1%          | 1.53               | 1.02-2.28 | 0.0094  |
| 0.02     | 42.7%            | 1.53               | 1.02-2.31 | 41.8%          | 1.52               | 1.01-2.32 | 0.0074  |
| 0.05     | 42.4%            | 1.53               | 1.01-2.31 | 40.9%          | 1.52               | 1.00-2.34 | 0.0048  |
| 0.1      | 41.8%            | 1.53               | 1.01-2.31 | 41.1%          | 1.52               | 1.01-2.32 | 0.0054  |

*List of supplementary figures*

Supplementary Figure 1. Power of three trend tests of association at a 5% significance level for a high risk allele frequency of 5% as a function of the allelic odds ratio in the absence of population structure ( $F_{ST} = 0$ ): T\_CC, cases against controls from the source population, without correction for population structure; T\_F, cases against control cohort expanded by external samples, without correction for population structure; T\_FmDs, cases against control cohort expanded by external samples, corrected for up to three axes of genetic variation determined through MDS. Power is estimated over 5,000 replicates of 100 cases, 100 controls and 100 samples from each of three external cohorts.

Supplementary Figure 2. Power of three trend tests of association at a 5% significance level for a high risk allele frequency of 5% as a function of the allelic odds ratio in the presence of population structure ( $F_{ST} = 0.01$ ): T\_CC, cases against controls from the source population, without correction for population structure; T\_F, cases against control cohort expanded by external samples, without correction for population structure; T\_FmDs, cases against control cohort expanded by external samples, corrected for up to three axes of genetic variation determined through MDS. Power is estimated over 5,000 replicates of 100 cases, 100 controls and 100 samples from each of three external cohorts.

Supplementary Figure 1.

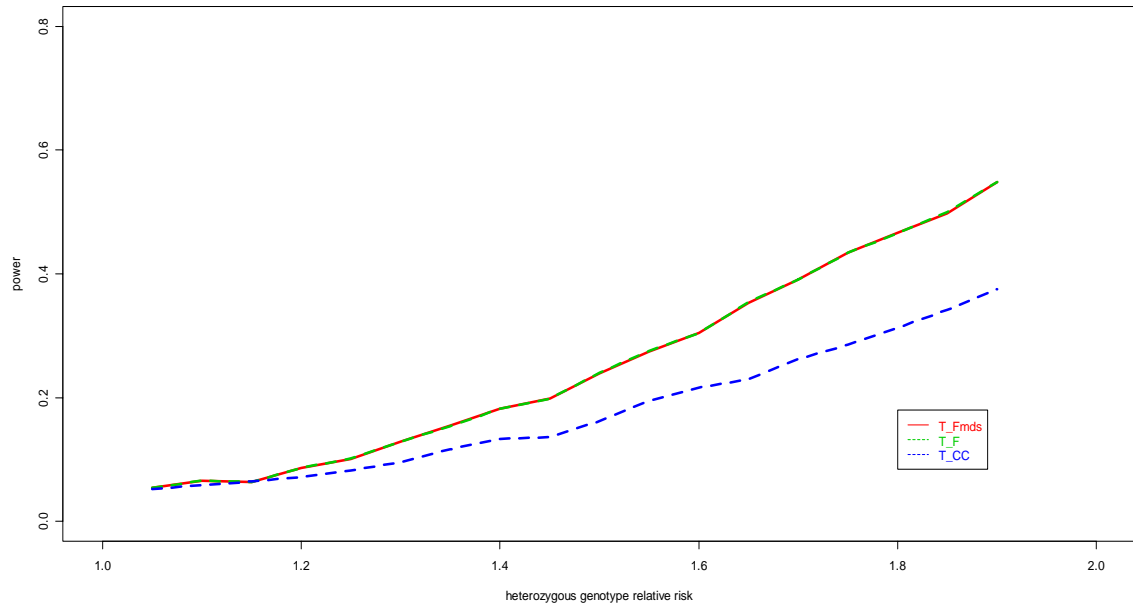

Supplementary Figure 2.

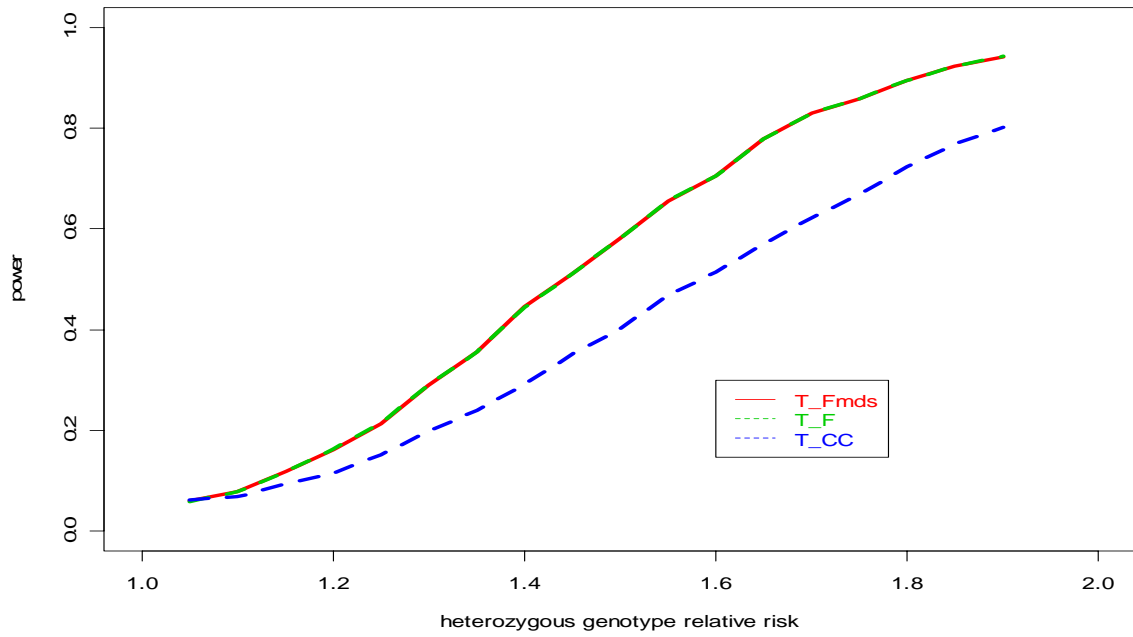

Supplement: gepi0034-0319-SD1.pdf [file gepi0034-0319-SD1.pdf]
